# Supplementary material
Source: publisher figshare collection journal article supplement (https://acs.figshare.com/ndownloader/files/30418918)
Supplement: Supplementary file 1 [file 30418918]

## Sheet: Title
! Title: Pyrolysis of lignocellulosic biofuel di-n-butyl ether (DBE): Flow reactor experiments and kinetic modeling
! Corresponding Author:
! Bin Yang - Center for Combustion Energy and Key Laboratory for Thermal Science and Power Engineering of MOE, Tsinghua University, Beijing, 100084, China
! Authors:
! Xuefeng Fan - Center for Combustion Energy and Key Laboratory for Thermal Science and Power Engineering of MOE, Tsinghua University, Beijing, 100084, China
! Zhongkai Liu - Center for Combustion Energy and Key Laboratory for Thermal Science and Power Engineering of MOE, Tsinghua University, Beijing, 100084, China
! Jiuzhong Yang - National Synchrotron Radiation Laboratory, University of Science and Technology of China, Hefei, 230029, China

## Sheet: 30 torr data
Tmax/K		C balance deviation	Mole fractions
			C4H9OC4H9	CH3	CH4	C2H2	CO	C2H4	C2H5	CH2O	C2H6	C3H3	C3H4-A	C3H4-P	C3H5-A	CH2CO	C3H6	C2H3OH	CH3CHO	C3H8	C4H4	C4H6	CH3CHCO	C2H3CHO	C4H8-1	C5H6	C5H81-3	C4H6O	sC3H5CHO	C5H10	nC3H7CHO	nC4H9OH	C6H6	C6H8	C6H5CH3
		Total=0.04	di-n-butyl ether	methyl	methane	acetylene	carbon monoxide	ethylene	ethyl radical	formaldehyde	ethane	propargyl radical	allene	propyne	allyl radical	ketene	propene	vinyl alcohol	acetaldehyde	propane	vinylacetylene	1,3-butadiene	methylketene	2-propenal	1-butene	1,3-cyclopentadiene	1,3-pentadiene	Dihydrofuran isomers	2-butenal	Pentene isomers	n-butanal	1-butanol	benzene	Cyclohexadiene isomers	toluene
956		-0.00235531	0.005	2.82712e-07	5.74569e-06	8.40605e-08	1.42533e-05	6.64614e-06	2.71742e-07	1.33782e-06	0	3.45319e-09	4.91515e-07	0	7.5462e-09	1.32094e-07	3.68e-07	9.35912e-08	1.19282e-07	2.06697e-07	2.12333e-08	2.54929e-08	1.07585e-07	4.76743e-06	0	0	0	1.74023e-08	3.63506e-07	9.71986e-07	0	8.02206e-06	2.05774e-08	1.5891e-09	1.24082e-07
981		0.022265	0.00487	1.48058e-06	2.62771e-06	1.58452e-07	1.7891e-05	1.58333e-05	1.17026e-06	2.54195e-06	1.71236e-07	4.546e-08	4.08135e-07	0	0	9.03738e-08	3.59976e-07	0	5.40004e-07	5.85919e-07	0	7.14257e-08	1.79791e-07	5.571e-06	6.71488e-06	0	0	3.65488e-08	4.07742e-07	8.06649e-07	1.32212e-06	0	1.38962e-08	8.6032e-09	4.05306e-08
1006		0.0345708	0.0048	2.71575e-06	1.21374e-06	1.67739e-07	5.41205e-06	4.27298e-05	1.73475e-06	7.35518e-06	2.92952e-07	8.32769e-09	4.42298e-07	0	2.59134e-08	9.45329e-08	7.26778e-07	2.71876e-07	2.13265e-07	9.87882e-07	1.18945e-09	3.0577e-08	5.85829e-07	2.03279e-06	9.23016e-06	1.7352e-08	3.28686e-08	0	4.47997e-07	7.44431e-07	8.21245e-06	1.47322e-05	5.50752e-08	8.65261e-09	0
1031		0.0156515	0.00486	7.436e-06	3.10984e-06	3.16648e-07	1.70293e-05	0.000114411	2.67598e-06	1.99601e-05	1.0873e-06	0	9.34671e-07	0	3.41864e-08	6.92971e-08	2.45053e-06	5.73874e-07	9.56656e-07	1.73544e-06	4.11677e-09	1.71603e-07	7.05151e-07	3.76329e-07	2.19155e-05	3.03217e-08	8.85631e-08	0	3.35852e-07	7.54278e-07	2.03724e-05	1.07264e-05	3.21073e-08	1.5773e-08	8.37689e-09
1056		0.0404966	0.00464	1.53268e-05	7.46053e-06	1.01429e-07	2.78927e-05	0.000266633	3.94798e-06	5.03391e-05	3.10356e-06	0	2.18526e-07	1.62906e-07	3.61606e-08	8.94394e-08	8.31749e-06	1.01656e-06	2.85601e-06	7.01242e-06	0	3.1309e-07	1.33377e-07	9.33207e-06	6.10817e-05	0	0	3.86432e-08	4.02942e-07	6.1044e-07	4.49805e-05	3.30423e-05	4.48107e-08	3.43163e-09	9.76203e-08
1081		0.0417704	0.00446	2.89318e-05	1.96937e-05	1.98875e-07	3.00438e-05	0.000634044	4.81311e-06	0.000121078	9.57381e-06	1.41312e-08	7.51407e-07	0	2.32325e-07	4.38986e-07	1.95859e-05	4.20863e-06	4.14764e-06	1.78332e-05	6.2463e-09	7.38174e-07	1.09213e-06	1.32427e-07	0.000102614	1.20895e-08	1.136e-07	5.87261e-08	4.12358e-07	9.65986e-07	0.000103328	4.33149e-05	2.06368e-08	1.70858e-09	4.90792e-08
1107		0.0436833	0.00412	4.96572e-05	5.85095e-05	8.57078e-07	7.93341e-05	0.00129	6.17049e-06	0.000258447	3.53317e-05	4.47681e-09	4.58075e-07	1.56097e-07	4.82346e-07	7.33242e-07	4.1016e-05	6.92745e-06	1.16559e-05	4.76216e-05	1.83344e-08	2.7016e-06	9.9097e-07	4.71105e-06	0.000198377	0	0	7.8342e-08	5.14127e-07	1.26018e-06	0.00018996	7.83592e-05	5.47015e-08	0	1.05438e-07
1131		0.020571	0.00365	6.92982e-05	0.000119891	2.92833e-06	0.000201908	0.0025	6.6327e-06	0.000501233	9.53692e-05	2.0293e-08	7.94547e-07	4.29328e-07	7.00296e-07	2.16525e-06	9.19484e-05	1.64641e-05	2.02927e-05	0.000107507	2.29617e-08	8.39183e-06	9.79333e-07	1.17704e-05	0.000327316	0	0	9.81219e-08	5.82334e-07	2.04086e-06	0.000319446	0.000130396	1.74269e-08	1.38147e-08	1.0471e-07
1156		0.0711654	0.00266	9.46576e-05	0.000169669	9.6113e-06	0.000374454	0.00413	6.37767e-06	0.000825008	0.00014555	6.19273e-08	2.13741e-06	1.1262e-06	6.01921e-06	4.56892e-06	0.000175016	3.20454e-05	3.40874e-05	0.000176785	1.03468e-07	2.14177e-05	1.09932e-06	2.09555e-05	0.00046252	2.0535e-08	1.63471e-07	5.12989e-08	8.84918e-07	3.43852e-06	0.000435945	0.000204235	3.41313e-08	3.59906e-09	1.41172e-07
1181		0.103168	0.00169	0.000109861	0.000318068	2.48602e-05	0.00079463	0.00606	4.10132e-06	0.00117	0.000266115	3.1434e-08	3.12275e-06	4.81464e-06	6.95081e-06	1.0498e-05	0.000281491	5.99852e-05	4.31371e-05	0.000233524	4.34171e-07	4.20137e-05	2.13307e-06	2.61114e-05	0.00057246	8.98056e-08	3.48983e-07	2.19827e-07	1.20213e-06	4.27066e-06	0.000487876	0.000227686	3.02794e-08	9.98223e-09	2.14121e-07
1206		0.124317	0.000849292	0.000125116	0.000460092	5.70925e-05	0.00146	0.00795	4.26724e-06	0.00142	0.000381555	1.65314e-07	1.30321e-05	6.56204e-06	1.09655e-05	1.71092e-05	0.000381	8.65706e-05	4.85762e-05	0.000268243	1.24191e-06	7.00255e-05	3.45563e-06	3.52587e-05	0.000594562	2.60299e-07	1.37511e-06	8.39155e-07	1.97154e-06	4.68722e-06	0.000459634	0.00024474	6.08014e-08	7.81849e-08	3.42274e-07
1231		0.121095	0.000293817	0.000138017	0.000639035	0.000122967	0.00208	0.00958	1.61179e-06	0.00154	0.000493171	2.88183e-07	2.52611e-05	1.70863e-05	2.35653e-05	2.75396e-05	0.000504042	0.000105418	5.53551e-05	0.000286494	2.98891e-06	0.000101885	4.60508e-06	3.42572e-05	0.000553186	5.25564e-07	1.52424e-06	3.80202e-07	1.62645e-06	4.29588e-06	0.000325652	0.000240145	1.57544e-07	1.7216e-07	2.95509e-07
1257		0.108569	6.81445e-05	0.000134843	0.000890436	0.000229068	0.00201	0.01087	1.88678e-06	0.00154	0.000628648	7.37007e-07	4.83602e-05	3.20108e-05	2.39169e-05	3.76597e-05	0.000537681	9.98038e-05	7.6717e-05	0.000289361	5.47545e-06	0.000126601	6.23889e-06	1.94713e-05	0.000434322	1.05235e-06	1.70812e-06	4.01829e-07	2.32466e-06	2.28777e-06	0.000190807	0.000175012	2.76437e-07	2.77652e-07	3.26038e-07

## Sheet: 760 torr data
Tmax/K		C balance deviation	Mole fractions
			C4H9OC4H9	CH4	C2H2	CO	C2H4	CH2O	C2H6	C3H4-A	C3H4-P	C3H5-A	CH2CO	C3H6	C2H3OH	CH3CHO	C3H8	C4H4	C4H6	CH3CHCO	C2H3CHO	C4H8-1	C5H6	C5H81-3	C4H6O	sC3H5CHO	C5H10	nC3H7CHO	nC4H9OH	C6H6	C6H8	C6H5CH3
		Total=0.04	di-n-butyl ether	methane	acetylene	carbon monoxide	ethylene	formaldehyde	ethane	allene	propyne	allyl radical	ketene	propene	vinyl alcohol	acetaldehyde	propane	vinylacetylene	1,3-butadiene	methylketene	2-propenal	1-butene	1,3-cyclopentadiene	1,3-pentadiene	Dihydrofuran isomers	2-butenal	Pentene isomers	n-butanal	1-butanol	benzene	Cyclohexadiene isomers	toluene
796		-0.0193406	0.00506	1.22063e-06	1.11825e-06	0.000212238	1.92727e-05	1.48785e-05	7.58258e-07	5.58031e-07	3.20474e-07	6.24876e-09	1.67588e-07	2.83663e-06	6.43294e-08	2.99742e-06	5.79149e-07	3.09464e-08	1.55258e-05	2.10607e-07	3.92653e-06	0	1.40958e-08	2.2634e-06	2.32069e-08	1.2777e-06	6.79211e-07	8.63752e-06	3.75303e-06	1.82072e-08	1.90807e-08	7.90821e-08
823		-0.0188647	0.00503	2.29451e-06	1.28437e-06	0.00023294	3.33082e-05	1.45932e-05	6.34446e-07	2.15092e-07	6.20632e-07	1.59196e-08	1.33128e-07	2.61057e-06	1.16431e-07	2.17963e-06	1.22866e-06	2.65399e-08	1.9447e-05	4.65288e-07	1.08853e-06	3.06502e-05	1.06461e-08	8.81933e-07	1.15933e-07	1.11589e-06	6.24621e-07	1.23154e-05	1.41725e-06	2.4559e-08	3.09554e-08	1.04e-07
850		-0.0080569	0.00494	5.25822e-06	1.49922e-06	0.000236564	7.72818e-05	1.68792e-05	3.40918e-06	0	8.39678e-07	0	1.22107e-07	4.17346e-06	2.34188e-07	2.4522e-06	1.38716e-06	4.592e-08	2.23239e-05	3.88849e-07	3.76052e-06	5.75927e-05	0	0	6.31844e-08	9.31443e-07	6.24751e-07	2.27017e-05	7.45823e-06	9.55082e-09	1.08472e-08	9.40152e-08
878		-0.0194054	0.00493	1.19474e-05	1.77371e-06	0.000249536	0.000190296	3.00099e-05	5.58991e-06	1.65697e-07	7.92791e-07	1.1841e-08	4.28924e-07	7.05748e-06	4.01187e-07	2.90794e-06	2.54906e-06	1.79628e-08	2.18111e-05	8.3209e-07	3.73967e-06	9.83333e-05	5.28695e-09	1.11384e-06	1.11301e-07	1.09398e-06	7.43662e-07	5.0093e-05	1.1691e-05	1.93156e-08	1.12369e-08	9.70315e-08
905		-0.026065	0.00481	2.58737e-05	1.44097e-06	0.000264201	0.000482655	6.18588e-05	8.99592e-06	0	8.20065e-07	5.3779e-09	4.4911e-07	1.60964e-05	1.50975e-06	5.54897e-06	6.34723e-06	6.15828e-08	2.08489e-05	1.0342e-06	0	0.00014939	7.26014e-09	1.4394e-06	7.58722e-08	1.67741e-06	8.55382e-07	0.000116008	1.92894e-05	4.90179e-08	1.20386e-08	1.22421e-07
930		-0.0421575	0.00462	6.83823e-05	2.32224e-06	0.000307671	0.00108	0.000131897	1.76377e-05	4.50794e-07	3.09653e-07	8.7441e-09	1.22923e-06	3.98792e-05	3.00607e-06	1.1055e-05	1.58198e-05	7.50518e-08	2.2781e-05	7.29873e-07	1.31462e-05	0.000203082	2.0354e-10	2.95067e-08	6.83369e-08	2.63226e-06	1.29795e-06	0.000230079	1.90836e-05	5.07698e-08	7.13205e-09	8.65452e-08
956		-0.0546947	0.00417	0.000184925	3.22281e-06	0.000475847	0.00221	0.00026511	4.30472e-05	0	1.06025e-06	1.72612e-07	3.19921e-06	9.18743e-05	7.52404e-06	2.02282e-05	4.14276e-05	6.73342e-08	2.4952e-05	1.87407e-06	6.95922e-06	0.000284517	4.46843e-08	1.22326e-06	1.88046e-07	3.93879e-06	2.12037e-06	0.000426409	4.37222e-05	5.03345e-08	0	9.88375e-08
981		-0.0563563	0.00341	0.000343616	7.3388e-06	0.000922977	0.00401	0.00045664	7.64057e-05	4.00651e-07	1.49855e-06	1.47663e-07	8.8332e-06	0.000195876	1.72396e-05	3.21686e-05	7.67145e-05	1.36513e-07	3.54206e-05	2.19072e-06	2.692e-05	0.000382642	4.22877e-08	6.09177e-07	2.72333e-07	5.66242e-06	4.87132e-06	0.000623026	8.91086e-05	4.97895e-08	4.8193e-08	9.24984e-08
1006		-0.0603787	0.00242	0.000666157	2.08181e-05	0.00165	0.00653	0.000671218	0.000146249	2.89165e-06	4.50108e-07	3.53393e-07	2.13677e-05	0.000357669	3.07717e-05	5.27097e-05	0.000122425	3.77877e-07	6.02276e-05	3.96593e-06	4.71948e-05	0.000486823	1.62725e-07	1.48107e-06	4.59408e-07	8.78273e-06	9.29316e-06	0.0007491	0.000134612	9.96963e-08	1.23326e-07	8.22567e-08
1031		-0.0674616	0.00133	0.00112	5.85366e-05	0.00298	0.00961	0.000819272	0.000258645	4.47111e-06	5.85023e-06	8.5847e-07	4.66378e-05	0.000566711	4.10534e-05	9.13313e-05	0.00017828	1.96926e-06	0.000112723	7.67552e-06	5.34009e-05	0.000524376	6.27564e-07	2.49487e-06	3.91619e-07	9.50461e-06	1.25308e-05	0.000678338	0.00016491	4.37642e-07	5.73978e-07	1.06594e-07
1056		-0.0774111	0.000536556	0.00156	0.000148773	0.00508	0.01248	0.000816376	0.000344282	7.70128e-06	1.53227e-05	1.35475e-06	7.49324e-05	0.000722912	3.74287e-05	0.000135292	0.00019969	5.81357e-06	0.000177878	1.1259e-05	7.03582e-06	0.000450258	2.29137e-06	4.62099e-06	4.36038e-07	7.91427e-06	1.12048e-05	0.000436018	0.000161883	1.70542e-06	1.4726e-06	2.58098e-07
1081		-0.0771897	0.0001248	0.00192	0.000311187	0.00534	0.01413	0.000656517	0.000411452	1.42088e-05	3.39227e-05	1.72462e-06	9.31493e-05	0.00078513	1.98023e-05	0.000149676	0.000181945	1.41268e-05	0.000237407	1.0745e-05	1.90778e-08	0.000316422	5.27933e-06	5.70656e-06	4.09701e-07	4.65855e-06	6.26489e-06	0.000173301	0.000124196	5.14422e-06	3.14928e-06	5.69166e-07
1107		-0.0162417	1.40942e-05	0.00203	0.000504913	0.00752	0.01382	0.000431288	0.000415579	2.85973e-05	5.83928e-05	1.71552e-06	9.97339e-05	0.000716778	6.63743e-06	0.000142664	0.000148209	2.78413e-05	0.000257521	6.43556e-06	2.12715e-08	0.000178983	1.05168e-05	6.12546e-06	1.54327e-07	2.52049e-06	2.1619e-06	4.46476e-05	5.65639e-05	1.261e-05	5.05204e-06	1.34526e-06

## Sheet: PIE data at 30 torr 1181 K
Energy (eV)	CH3	C2H4	C2H5	CH2O	C3H3	C3H4	C3H5	C2H2O	C3H6	C2H4O	C4H4	C4H6	C3H4O	C4H8	C5H6	C5H8	C4H6O	C5H10	C4H8O	C4H10O	C6H6	C6H8	C7H8	C8H18O
7.9996	0	0.00239946	0.00178672	0	0	0	0	0	0.00245338	0	0	0	0	0.00425806	0	0	0	0	0	0	0	0	0	0
8.03984	0	0.00244079	0	0	0	0	0.00244109	0	0	0.00244109	0	0	0	0.00130618	0	0	0	0	0.00244109	0	0	0	0.00244109	0
8.08002	0	0.00484054	0	0	0	0	0.00734149	0	0	0.00244716	0	0	0	0.00403159	0	0	0	0	0	0	0	0	0	0
8.1196	0	0.00248886	0	0.00248886	0	0.00180442	0.0596732	0	0.000517653	0.00248886	0	0	0	0.00177046	0	0	0	0	0	0	0	0.00248886	0	0
8.15981	0	0	0	0.00250635	0	0	0.0869078	0	0.00214281	0	0	0	0	0.00162275	0	0	0	0	0	0	0	0	0	0
8.19977	0	0	0	0.0024987	0	0	0.134992	0	0.00303835	0	0	0	0	0.00400639	0	0	0	0	0	0	0	0	0	0
8.23965	0	0.000490392	0	0	0	0	0.1831	0	0.00621342	0	0	0	0	0	0	0	0	0	0	0	0	0.00245196	0	0
8.27993	0.00198669	0.00248336	0.0024285	0	0	0	0.173835	0	0.00667638	0.00248336	0	0	0	0	0	0	0	0	0	0	0	0.00496673	0	0.00248336
8.31987	0	0.00255268	0.00760165	0.00331849	0	0	0.166818	0	0	0	0	0	0	0	0	0	0	0	0	0	0	0.00255268	0	0
8.35985	0	0	0.00972575	0	0	0	0.178954	0	0	0	0	0	0	0	0	0	0	0	0	0	0	0.00518707	0.00259353	0
8.40003	0	0	0.0154554	0	0.00257594	0	0.177739	0	0.00701036	0.00186756	0	0	0	0.00401678	0	0	0.00257594	0	0	0	0	0	0	0
8.43965	0	0	0.0182309	0	0	0	0.216166	0	0	0	0	0	0	0	0	0	0	0	0	0	0	0.00520883	0.00260441	0
8.4797	0	0	0.0294493	0	0	0	0.185664	0	0	0	0	0	0	0.00393867	0	0	0	0	0	0	0	0.00267721	0	0
8.51992	0	0	0.0289992	0	0	0	0.201614	0	0.00438958	0	0	0	0	0.00406316	0	0	0	0.00276183	0	0	0	0.00552366	0	0
8.55957	0	0	0.0642202	0	0	0	0.267142	0	0.0023471	0.00279218	0	0	0	0	0.00279218	0.00270909	0	0.00278886	0.00279218	0	0	0.00279218	0	0.00277676
8.59997	0.00228918	0	0.0715369	0.00371992	0	0	0.176481	0	0	0	0	0	0.00286148	0.00115283	0.00572295	0.00571604	0.00572295	0	0	0	0	0.00286148	0	0.00284567
8.63966	0	0	0.096361	0	0	0	0.206992	0.00294232	0.00360989	0	0.00183895	0	0	0	0.00294232	0.00882341	0	0.00293156	0.0205963	0	0	0.00294232	0	0
8.67977	0	0.00301657	0.0700686	0.00603314	0	0.00301657	0.288511	0	0.00555446	0	0.00301657	0	0	0.000756689	0.00301657	0.0120626	0	0.00300186	0.0482651	0	0	0.00904971	0	0.00275564
8.72006	0	0.00308168	0.0893007	0.00616336	0.00308168	0	0.291757	0	0.00438718	0	0	0	0	0.00734388	0.0176426	0.00167362	0.0123267	0	0.0646808	0	0	0.0123267	0	0.00282239
8.75998	0	0.00318003	0.145416	0	0.00318003	0	0.252334	0	0	0.00223442	0	0	0	0.00177865	0.00636006	0.012557	0.00318003	0	0.0794918	0.0026884	0	0.00636006	0	0
8.79999	0	0	0.105361	0.00658505	0.00658505	0	0.253522	0.00329253	0	0.00237989	0	0.00314819	0	0.00726975	0.0164626	0.0296129	0.00329253	0	0.0921815	0	0	0.00987758	0.00658505	0
8.83975	0	0.00340666	0.157483	0.00340666	0.00340666	0	0.261205	0	0	0	0	0	0	0.00100466	0.0238466	0.0340378	0.00681332	0.00336514	0.105587	0	0.00340666	0.0136205	0.00681332	0
8.87996	0	0	0.142406	0.00698923	0.00698923	0	0.399607	0	0	0	0	0	0	0.00529522	0.0244623	0.0383745	0.00698923	0.0139316	0.155961	0	0	0.00349462	0.0139785	0.0102146
8.9199	0	0.00362418	0.152135	0.00235571	0.00724835	0	0.411976	0	0	0	0	0.0096264	0.00724835	0.0298264	0.0289934	0.0398309	0.0282686	0.010745	0.18113	0	0	0.00362418	0.0181209	0
8.95969	0	0.00374941	0.12271	0.00374941	0.00243712	0	0.315044	0	0.00834362	0	0	0.0224965	0.0187471	0.0647887	0.0299953	0.0337085	0.0149977	0.00922796	0.204957	0.00307828	0	0	0.0112482	0.04114
8.99993	0	0.000776206	0.147462	0.00388103	0	0	0.430892	0	0.00129512	0.00174646	0	0.0685241	0.0155241	0.0893776	0.029981	0.0504172	0.0116431	0.0345928	0.158399	0	0	0.00776206	0.0403627	0.0774276
9.04012	0	0	0.142503	0.00259096	0.0039861	0	0.446541	0	0	0.0039861	0	0.215249	0.0191333	0.087283	0.0239166	0.0676809	0.0079722	0.0517367	0.219684	0	0	0.0119583	0.0518193	0.198947
9.07967	0	0	0.14514	0	0.0165874	0	0.53359	0	0	0	0	1.50323	0.038151	0.204455	0.0082937	0.0704865	0.0240517	0.086983	0.271012	0.00105571	0	0.00414685	0.0456154	0.589367
9.12003	0	0.00420308	0.163212	0.0128926	0.00859504	0	0.482823	0	0	0.0031157	0	1.8424	0.0515702	0.372668	0.0343802	0.0945039	0.0421157	0.128623	0.230808	0	0	0.00859504	0.0687603	1.55602
9.15975	0	0	0.192678	0	0.0177175	0	0.516901	0	0.0139364	0.00963388	0	2.19506	0.0611253	0.535372	0.035435	0.0865514	0.0301197	0.159352	0.334736	0	0.00442937	0.0044214	0.0487231	3.26814
9.19999	0	0	0.203011	0	0.0230695	0	0.532206	0.00461391	0.0101088	0.0415151	0	2.64977	0.114425	0.925895	0.0230695	0.120211	0.0184556	0.16134	0.333315	0.00454194	0	0.00922781	0.0645947	6.76674
9.23993	0	0	0.127608	0	0.0192617	0.000211065	0.566762	0	0.00800979	0.0743983	0	3.10595	0.0606744	1.07912	0.0323837	0.0817685	0.0626006	0.266608	0.379913	0.00544326	0.00963085	0.0240598	0.0626006	11.8932
9.27997	0	0	0.244528	0.0150479	0.0200638	0	0.600277	0	0.0152892	0.157752	0.00501595	4.48476	0.115367	1.46201	0.0250798	0.103047	0.0501595	0.220446	0.50075	0.0025242	0.00501595	0.00500692	0.0752393	19.6939
9.31993	0	0.000922926	0.202166	0.0103686	0.0103686	0.00484429	0.632321	0	0.00270611	0.385971	0.00324018	4.58846	0.118202	1.82789	0.0155529	0.113919	0.0197003	0.273545	0.457183	0.0176817	0	0.00673958	0.0777644	29.7918
9.35989	0	0	0.211763	0	0.0108597	0	0.621033	0	0.00419782	0.802122	0	5.39102	0.116198	2.37107	0.0434387	0.150082	0.0434387	0.379462	0.513807	0	0	0.0162895	0.135746	44.3499
9.39998	0	0	0.263249	0.0169839	0.0226452	0	0.62316	0	0.019051	0.813106	0.00566131	5.44744	0.0758616	2.84658	0.0339679	0.198105	0.0554808	0.475308	0.582999	0.011167	0	0	0.0758616	61.025
9.43992	0.0116018	0.00559054	0.276868	0.0116018	0.0211732	0	0.669125	0	0.0158998	1.11313	0	6.59667	0.0858531	3.57009	0.0258139	0.176945	0.0754115	0.521441	0.694071	0	0	0.0174027	0.145022	79.7801
9.48013	0	0	0.221889	0	0.0098951	0	0.601799	0.00599703	0.0101124	1.27922	0	7.54184	0.165518	4.87299	0.0179911	0.0876996	0.076762	0.49165	0.783613	0.0236482	0	0.0119941	0.149926	95.4219
9.52006	0	0.0124869	0.252583	0.00811646	0.00811646	0	0.63074	0.00624343	0.0416059	1.89908	0	8.46859	0.224764	5.91592	0.0312172	0.137839	0.0486988	0.63354	0.821133	0.00437557	0.0170134	0.0143293	0.15234	111.238
9.5595	0	0	0.29075	0	0.0129945	0.00249764	0.599932	0.0129945	0.0711492	2.30519	0.00649723	8.18456	0.254691	8.88116	0.0242022	0.22445	0.0558762	0.707924	0.813676	0	0.00292375	0.0103903	0.145538	127.621
9.59984	0.00669342	0	0.309562	0.0110442	0.0177376	0.00243039	0.629263	0.21419	0.206796	2.47773	0.112952	8.86804	0.243641	14.8434	0.0431726	0.224209	0.0401605	0.85569	1.0647	0	0.0230923	0.00865989	0.125836	131.205
9.63981	0	0.00106951	0.327242	0	0.0205613	0.00737892	0.714939	0.457831	0.32593	3.16526	0.0625406	9.69665	0.29197	24.5388	0.0460915	0.195794	0.0671668	0.856481	1.27484	0.0748047	0.0279291	0.0136573	0.143929	144.534
9.67957	0.0199006	0	0.342928	0	0.00461978	0.0101542	0.667933	0.479036	0.67837	3.37157	0.0701852	10.2459	0.210378	29.2071	0.0193675	0.256552	0.0980815	0.958939	1.26249	0.0305692	0.00515283	0	0.146412	147.181
9.71992	0.0514403	0.00293916	0.297554	0.0121252	0.0220459	0.0152603	0.888857	0.792181	3.41457	4.00988	0.0734862	11.5953	0.399765	38.7938	0.0159833	0.21226	0.0676073	1.12359	1.814	0.027354	0.0159833	0.0242217	0.119048	157.173
9.76004	0.174873	0.000912866	0.444763	0.00988414	0.0304127	0.030746	0.729263	0.824185	11.0678	4.45271	0.0959902	11.9909	0.367994	49.8376	0.0663378	0.303338	0.106445	1.1173	2.68367	0.0711615	0.0199584	0.0220133	0.165749	161.873
9.79977	0.43405	0.0090476	0.353812	0.0203942	0	0.101394	0.858992	0.874257	13.6469	5.12411	0.103895	12.4142	0.524862	60.4623	0.0153919	0.288963	0.120056	1.26557	6.62803	0.108498	0.0257814	0.0330461	0.181624	170.042
9.83996	3.24167	0	0.458353	0.0316107	0	0.0545284	0.844186	1.08899	17.1679	5.34319	0.241031	13.7607	0.349298	75.0116	0.0150151	0.304099	0.0837683	1.43396	17.8625	0.0278128	0.0322034	0.0362943	0.124862	173.927
9.87991	4.30267	0	0.407169	0.0401097	0	0.222426	0.811688	1.4796	21.1583	6.28102	0.198523	13.5391	0.380839	83.1104	0.0212703	0.315719	0.116683	1.36091	34.6383	0.17373	0	0.0567207	0.267398	179.417
9.91979	4.2661	0	0.419252	0.0355233	0.00247837	0.231233	0.882332	1.60433	28.6311	6.69412	0.170388	12.7808	0.560112	92.7702	0.073525	0.369602	0.123919	1.5526	50.4746	0.28795	0.0148702	0.00988672	0.22801	181.515
9.9597	4.65683	0.00935676	0.45256	0.0104808	0.0385694	0.505587	0.925782	1.85636	35.8555	7.53467	0.171885	13.282	0.494694	107.237	0.0960041	0.41585	0.0905541	1.71674	66.1382	0.310199	0.00817503	0.0469393	0.288432	188.723
9.99973	4.77015	0	0.530847	0.00208997	0.0221537	0.66263	0.82358	2.09666	40.5042	8.01138	0.191232	13.0846	0.672134	118.073	0.0622811	0.408219	0.173886	2.05552	75.6776	0.984974	0	0.0493233	0.260828	192.742
10.0398	5.23514	0.025691	0.479693	0	0.0165026	0.923394	1.09581	2.22405	43.9865	8.15009	0.137522	13.0778	0.563628	128.626	0.0583939	0.378643	0.165872	1.79746	88.0646	1.4179	0.0319474	0.0583364	0.265734	198.117
10.0801	4.96206	0.0324291	0.448735	0.0196907	0.0136979	1.09132	0.995063	2.30125	49.7672	9.6886	0.280379	13.2688	0.756809	140.163	0.0761945	0.381899	0.220879	1.92992	99.9733	1.93858	0.0496549	0	0.203756	198.903
10.1201	4.52417	0.0584751	0.467823	0.0426077	0	1.27307	1.10679	2.36882	55.7107	9.63855	0.291583	13.5152	1.75423	151.922	0.0789749	0.487632	0.151494	2.08245	106.547	3.40503	0.0968357	0.0222055	0.273722	206.547
10.1594	5.51119	0.0911065	0.485891	0.0427458	0.00215888	1.20566	1.081	2.42485	59.1901	10.4119	0.264463	13.8253	1.7461	165.232	0.0658458	0.454149	0.124351	2.2749	111.69	3.50395	0.0319514	0.0016696	0.191708	208.702
10.1999	6.03579	0.0954422	0.521223	0.00828612	0	1.5096	1.03319	2.85391	63.5949	10.7481	0.227868	15.6397	2.14393	184.55	0.0649806	0.480313	0.225034	2.34959	122.38	4.95191	0.0106847	0.0104475	0.308767	218.625
10.2398	5.52027	0.304606	0.48017	0.0524355	0.0405384	1.67374	1.15687	2.99455	67.2655	15.2966	0.27099	15.7376	2.48518	199.465	0.0286413	0.500342	0.220317	2.64044	129.198	5.64394	0.01388	0.0281756	0.378946	226.74
10.28	6.74503	0.406219	0.406727	0.0349369	0.0614713	1.77645	1.23993	2.61098	69.0327	16.0315	0.284139	16.2065	2.31203	213.274	0.0384748	0.519771	0.252961	2.52861	134.803	5.05245	0.00928703	0	0.392709	227.29
10.3198	5.9661	0.93296	0.605258	0.0440758	0	1.99289	1.07907	3.07297	71.351	17.2184	0.336078	17.2713	2.84377	235.034	0.0872701	0.509871	0.248588	2.6645	136.619	5.67917	0.0123412	0.00438537	0.278559	235.96
10.3597	6.56592	1.80153	0.497296	0.022638	0.0727968	2.4494	1.14271	2.76095	75.7455	18.1904	0.253013	18.4066	3.06457	257.729	0.0668044	0.44858	0.211288	2.83707	140.964	5.60656	0.0592584	0.0345162	0.340902	242.04
10.3999	6.34201	5.28663	0.522769	0.0290713	0.0228098	2.99315	1.41432	2.61373	78.2975	19.5708	0.231452	18.9892	3.17369	282.654	0.0395817	0.605452	0.282662	2.82987	147.19	5.84882	0.0476322	0.0285383	0.32202	245.456
10.4399	6.78844	6.84887	0.48048	0.0321473	0.00848332	3.59419	1.34175	2.8629	81.4531	21.6781	0.397376	20.5267	3.40761	318.35	0.0964419	0.453568	0.357192	3.07879	151.509	5.99373	0.0799218	0.0436122	0.36255	256.291
10.48	6.86332	14.4088	0.536247	0.00669374	0.0589049	3.95563	1.27326	2.9274	83.431	21.903	0.253247	20.0282	3.77884	344.681	0.119149	0.7658	0.426615	2.86596	156.056	5.78093	0.0798787	0.0346637	0.362355	259.874
10.5197	6.4587	132.129	0.562326	0.0486701	0.016674	4.78512	1.20777	2.95626	84.236	23.0345	0.332354	21.9874	3.90983	377.762	0.0989174	0.547386	0.304639	2.88923	155.878	5.73475	0.025687	0.0738602	0.376743	262.131
10.5596	6.66931	194.505	0.369687	0.154264	0.032309	4.67169	1.24351	3.01976	86.6606	24.7637	0.290099	22.3896	4.38311	428.467	0.0352669	0.578912	0.305798	3.03251	162.604	6.88127	0.0507388	0.0135604	0.39863	270.797
10.5996	6.86342	262.153	0.611204	0	0.0307816	5.1261	1.28178	2.54696	95.9623	29.3067	0.323207	24.3659	4.35516	496.719	0.0971819	0.544333	0.3342	3.74173	176.352	7.13085	0.060244	0.0720085	0.427424	294.577
10.6394	7.23078	289.289	0.822633	0.0884025	0.0710866	5.7976	1.44669	2.86351	99.197	31.0584	0.444291	25.5621	5.0271	561.33	0.128958	0.477184	0.322624	3.4439	183.015	6.96881	0.0175438	0.0728777	0.570515	307.689
10.6794	7.49147	359.609	0.927521	0.306544	0.152352	6.19332	1.30171	2.83531	97.5813	32.4465	0.462578	24.9414	5.02622	584.516	0.0699621	0.518127	0.355334	3.26503	177.218	6.65534	0.0202522	0.0100896	0.475006	298.887
10.7197	6.94296	429.038	1.1269	0.363112	0.207624	6.33404	1.47486	2.95288	100.9	34.436	0.514447	26.2618	5.05681	642.389	0.111194	0.700006	0.417094	3.60092	183.179	6.80533	0.0133802	0.0378097	0.45216	303.944
10.7599	7.42685	494.486	0.624355	0.722492	0.131067	6.35711	1.51015	3.04929	104.727	38.3303	0.400613	27.6641	5.92999	724.062	0.0518712	0.693672	0.389034	3.72462	194.398	8.2212	0.0192201	0.0620256	0.616897	318.576
10.7998	8.06231	503.791	1.2244	1.60448	0.23605	6.97991	1.26255	2.68994	106.322	38.6166	0.466938	28.3188	6.00309	767.239	0.175512	0.570052	0.427988	4.18086	192.33	7.40889	0.0262799	0.0318641	0.489933	322.275
10.8394	7.50329	565.51	1.43025	7.57052	0.411975	7.54414	1.77952	2.60346	113.348	42.1575	0.559075	29.758	6.3284	844.327	0.195736	0.692054	0.446307	4.48044	201.647	8.45011	0.0796295	0.0494463	0.411975	338.181
10.8798	8.29016	599.384	0.146435	109.173	0.299885	7.95783	1.71393	2.84463	114.98	44.4473	0.447448	30.1763	6.28141	911.383	0.148515	0.751748	0.399847	4.11383	207.097	8.80226	0	0.0247524	0.456968	341.162
10.92	7.84539	638.395	1.06222	169.307	0.391785	7.55554	1.85253	2.65775	118.223	47.6573	0.514551	31.5594	6.02061	976.39	0.192261	0.480909	0.389364	4.81002	213.308	9.36646	0.0818439	0.104458	0.677997	355.693
10.9597	8.22945	666.801	1.10508	176.228	0.381596	8.18809	1.68301	2.61694	119.223	53.3885	0.554645	32.9795	7.19608	1049.61	0.101808	0.704865	0.532459	4.83396	222.472	8.84022	0.0796223	0.0540886	0.587677	362.418
10.9999	8.15151	700.096	1.15122	191.036	0.462859	9.22325	1.79118	3.04707	127.546	55.8956	0.612313	35.2495	7.12382	1148.48	0.148455	0.568648	0.387882	4.95557	236.423	9.45213	0.081725	0.20679	0.691789	390.275
	C7H15O
	C8H16O
	C8H17O
	C8H18O

## Sheet: PIE data at 760 torr 1026 K
Energy (eV)	C2H4	CH2O	C3H4	C3H5	C2H2O	C3H6	C2H4O	C4H4	C4H6	C3H4O	C4H8	C5H6	C5H8	C4H6O	C5H10	C4H8O	C4H10O	C6H6	C6H8	C7H8	C8H18O
7.99991	0.00738673	0.000923341	0	0.00369336	0	0	0.000415504	0	0.000882864	0	0.0024049	0.000923341	0	0	0	0.0015466	0	0.000923341	0	0	0
8.02972	0.00476973	0	0	0.00462193	0	0	0.00159457	0.000924386	0	0	5.36589e-05	0	0	0	0	0	0	0.000924386	0	0	0.000254206
8.05992	0.000348836	0	0	0.000622101	0	0	0.000901026	0	0	0	0.00155896	0	0	0	0	0	0.000230408	0	0	0.000368652	0.000839733
8.08983	0.00272573	0.000908576	0	0.00363431	0	0	0.000658718	0	0	0.000908576	0	0.000908576	0	0	0	0	0	0	0.000908576	0	0
8.1197	0.00363658	0	0.000379302	0.00180548	0	0.000849385	0	0	0	0	0.000366275	0	0	0	0	0.000909145	0	0	0.00300018	0.000909145	0
8.14982	0.00361425	0.000908529	0	0.0106071	0	0	0	0	0	0	0.000157861	0	0	0	0	0	0	0	0.0063597	0.00181706	0.000903509
8.17974	0.000895263	0	0	0.0176176	0	0	0	0	0	0	0.00063697	0	0	0	0	0	0.000895432	0	0.00984976	0	0.00178592
8.20973	0	0	0.000137817	0.0146571	0	0.000412688	0.000896749	0	0	0	0.000195308	0	0	0	0	0	0	0	0.010761	0.0017935	0
8.23994	0.0017861	0	0	0.0113195	0	0.00141232	0	0	0	0	0.0013532	0	0.000893055	0	0	0.000312569	0.000892176	0	0.0190221	0	0
8.2698	0.000177088	0	0	0.0171332	0	0.00031966	0.000885438	0	0	0	0.000300146	0	0	0	0	0	0	0	0.0135472	0.000885438	0
8.29986	0.000884912	0.000884912	0	0.011526	0	0	0	0	0	0	0	0	0	0	0	0	0	0.000884912	0.0179621	0	0.000875133
8.33011	0	0	0	0.0157404	0	0	0	0	0	0	0.000450594	0	0	0	0	0.000835597	0	0	0.0334921	0.000874466	0
8.35994	0.00261975	0	0.000633146	0.0191919	0	0	0	0	0.00174661	0	0.000413592	0	0	0	0	0	0	0.000873305	0.0406945	0.00174661	0
8.39001	0.00101785	0	0.000154006	0.0155496	0	0.00124654	0	0	0	0	0.000492222	0	0	0.000880037	0	0.00087757	0	0	0.0447939	0.000880037	0.000865451
8.42005	0.000872807	0	0	0.0250355	0	0	0	0	0	0	0.000526805	0	0	0.00174616	0	0.00145751	0	0	0.0537816	0	0.000860416
8.45	0.000881455	0	0.000639055	0.0190845	0	0.000251008	0	0	0	0	0.00141331	0.000639055	0.00176214	0	0.00176076	0	0	0	0.046629	0.00158662	0.00256812
8.4798	0.00262918	0	0.000394377	0.0207356	0	0.0010679	0	0	0	0	0.00204986	0.000876393	0	0.000876393	0.000779815	0.00030428	0	0	0.0701114	0	0
8.51003	0.000858359	0	0.000636293	0.0187168	0	0	0	0	0.000850714	0	0	0.00127259	0.0026314	0.000877646	0.000834043	0.000589951	0	0.000877646	0.0774946	0	0
8.54002	0.00086243	0	0	0.0241175	0	0.000967204	0	0	0.000881809	0	0	0.00617266	0.00440159	0.00176362	0.00172299	0.006132	0	0	0.051674	0.000881809	0.00350288
8.56992	0	0	0	0.0237178	0	0	0	0.000889138	0	0	0	0.0368548	0.0111142	0	0.00083089	0.00622397	0	0.000644625	0.078243	0.00266741	0
8.59976	0.000177316	0	0	0.0245583	0	0.00184877	0	0	0	0	0	0.0377905	0.0207436	0.00265974	0.00166434	0.0138693	0	0.00064277	0.0823621	0.00354632	0.000862088
8.62991	0.00179702	0	0	0.0206658	0	0	0.00040433	0	0	0	0	0.0356934	0.0385732	0.00449256	0.00126912	0.0179265	0.000848001	0.00244844	0.0742126	0.000898511	0
8.66003	0.00270991	0	0	0.0259022	0	0.00275786	0	0.00180661	0	0	0.00128912	0.0525497	0.0448759	0.00162595	0.00175186	0.0235039	0	0.000903303	0.083283	0.00451652	0
8.68994	0	0	0	0.0273647	0	0	0.000901637	0.000901637	0	0	0.00022617	0.0569609	0.0771507	0.00360655	0.00215997	0.0550123	0	0.0033586	0.0762724	0.00540982	0.000181934
8.71969	0.000915485	0	0	0.0256336	0	0	0	0	0	0	0.0010241	0.0788919	0.0518585	0.00164787	0.00262853	0.0612954	0	0.00366194	0.0688379	0.00274645	0.000899046
8.75	0.00184544	0	0	0.0202999	0	0	0	0	0.000882271	0	0	0.0584544	0.0614288	0.000553633	0.00500003	0.0560077	0	0.00276817	0.0900527	0.00276817	0
8.78007	0	0	0	0.0274053	0	0	0	0	0.000933747	0	0.00147565	0.0835237	0.091898	0.00728323	0.00735784	0.0855682	0.000342786	0.00347821	0.0805761	0.00224099	0
8.81012	0.000939626	0	0	0.0194291	0	0	0	0	0.00187948	0	0.00126056	0.096018	0.105067	0.0120287	0.00832949	0.102091	0	0.00162105	0.0989518	0.00563844	0
8.84053	0	0	0	0.0248548	0	0.00106575	0	0	0.00188651	0.000943254	0.00116655	0.0758848	0.153423	0.0160353	0.0111319	0.130778	0	0.00257037	0.13356	0.0179218	0.000870572
8.86983	0.000962975	0.00158891	0.000962975	0.0141	0	0.00049701	0	0	0.00544674	0.0077038	0	0.0841158	0.175786	0.0215706	0.0147117	0.154885	0	0	0.108046	0.0115557	0.0019173
8.90014	0.00192339	0	0	0.0201036	0	0.000308513	0.000972378	0	0.00651493	0.0243095	0.0173631	0.104555	0.199112	0.0136133	0.0157299	0.182745	0.000636196	0.00167735	0.0821629	0.0233371	0.00477171
8.92965	0	0	0	0.0325915	0	0	0	0	0.0130952	0.0400675	0.025188	0.112287	0.184803	0.0150497	0.02274	0.185416	0.000849468	0.00266302	0.098698	0.0224769	0.00963724
8.95996	0.000999721	0	0	0.0289917	0	4.23507e-05	0.000999721	0	0.028692	0.0579838	0.0511487	0.110394	0.254925	0.0229936	0.0321799	0.20747	0.00169441	0.000724798	0.0938725	0.0257928	0.0164591
8.98995	0.00197551	0	0	0.027514	0	0.00165672	0.000729347	0	0.0715263	0.0573284	0.0461513	0.127661	0.273779	0.0195163	0.0449341	0.235457	0	0.00173534	0.0934539	0.0295763	0.0416131
9.01998	0	0	0	0.0395361	0	0.000738997	0.00102228	0	0.175015	0.0633816	0.0689677	0.105832	0.289467	0.023717	0.0931858	0.257724	0.000935388	0.000741156	0.115415	0.0357799	0.0793205
9.04995	0	0	0	0.0284787	0	0	0	0.00104128	0.654755	0.0863916	0.0772648	0.132607	0.265158	0.0347787	0.163678	0.269147	0	0.000468576	0.116831	0.0551878	0.164671
9.07971	0	0.000680209	0.000758695	0.0407876	0	0	0.00209295	0	3.04736	0.101508	0.122064	0.125839	0.409615	0.0385103	0.228678	0.278021	0	0.00227608	0.124003	0.0569283	0.426652
9.10991	0	0	0	0.0378233	0	0.000977471	0.000954206	0	3.55614	0.122916	0.277616	0.158345	0.354554	0.0409248	0.278407	0.293	0	0.00018554	0.135285	0.0551319	0.771279
9.13984	0.00151061	0	0.000972886	0.0273204	0.00107904	0.00244248	0.00185898	0.000539519	4.19584	0.103366	0.378807	0.129754	0.394059	0.0332344	0.252554	0.305101	0.000948271	0.00401942	0.0955956	0.0509306	1.44409
9.16972	0.000198118	0	0	0.0243468	0	0.0013747	0.00623649	0	4.61005	0.137257	0.507397	0.114163	0.388416	0.0433559	0.368939	0.398266	0	0.00871475	0.0939947	0.0620926	2.60092
9.19956	0.00332163	0.000724996	0	0.0405718	0.00111538	0	0.0132706	0	5.08446	0.161478	0.592841	0.155121	0.445096	0.0372537	0.403224	0.364679	0	0.00434998	0.114095	0.0579997	4.47793
9.22995	0.00446297	0.000335598	0	0.0499762	0	0.000586996	0.0399642	0	5.91054	0.226918	0.705788	0.143888	0.473412	0.03177	0.536249	0.388697	0.00262855	0.015046	0.120005	0.0664485	7.0194
9.25954	0	0.00305953	0	0.038964	0	0.0010224	0.0596031	0	7.06699	0.211181	0.835534	0.146598	0.531372	0.047567	0.547181	0.402933	0.000613721	0.0359928	0.136517	0.0604978	9.99535
9.28977	0.00371452	0.000348236	0	0.0426009	0.00116079	0	0.113274	0	8.3039	0.225123	1.18427	0.138337	0.551475	0.0494495	0.586686	0.474832	0.000909764	0.0307028	0.117881	0.0828802	14.5811
9.31986	0.00420105	0.000356227	0	0.0443501	0	0	0.227748	0	9.02452	0.264717	1.34219	0.147537	0.610025	0.0474969	0.624434	0.485494	0.00543563	0.0363648	0.108228	0.062221	19.4377
9.34964	0	0	0.001083	0.0332082	0	0	0.358549	0.000455396	9.47103	0.331528	1.55751	0.161605	0.579068	0.0619339	0.706676	0.48458	0.00741012	0.0409553	0.12938	0.0813641	25.2687
9.37965	0	0	0.00246406	0.0290522	0.000969153	0.00225005	0.445869	0	9.96289	0.334092	1.82446	0.112755	0.5935	0.0460348	0.786713	0.544215	0.00135911	0.0419461	0.124097	0.0913427	32.6586
9.40945	0	0.00369743	0.000967756	0.0434595	0.00225606	0	0.485674	0	10.8034	0.328382	2.09168	0.164723	0.677746	0.0546467	0.886556	0.578127	0.00574308	0.0576235	0.122475	0.105784	41.1214
9.4397	0.0105961	0.00460426	0.00224784	0.0428779	0.00227059	0.00249372	0.565531	0.00141912	11.63	0.362034	2.31995	0.148598	0.654297	0.0756865	0.858494	0.633905	0.00424862	0.0614322	0.146595	0.129676	47.9129
9.46975	0	0.000767541	0.00017143	0.0371236	0.00460525	0.00843226	0.58579	0	12.4688	0.363184	2.77549	0.117882	0.65022	0.0662644	0.991894	0.627761	0	0.0666162	0.129339	0.0928725	55.3008
9.49986	0.00104472	0.000718248	7.22488e-05	0.04923	0.00966371	0.0122822	0.779637	0	13.6441	0.489715	3.10656	0.173065	0.706593	0.0770485	1.01579	0.665766	0.000505754	0.0741755	0.153702	0.100294	62.5717
9.52963	0.00391928	0.000718534	0.000326606	0.0440158	0.0245608	0.0191226	1.12852	0.0111046	13.7253	0.466221	3.86522	0.15651	0.728361	0.0836113	1.17424	0.696457	0.000120409	0.0836766	0.13415	0.133778	67.6992
9.55961	0	0	0	0.0390418	0.0664019	0.0416064	1.11003	0.0159365	14.5582	0.532393	4.7987	0.160161	0.728595	0.090041	1.34886	0.787534	0.0105403	0.0861564	0.148851	0.0980092	72.5668
9.58993	0.00513433	0.00526997	0	0.0451663	0.205394	0.117556	1.23285	0.169585	15.0847	0.522692	7.09632	0.157694	0.743622	0.0916163	1.29495	0.885401	0.0129372	0.0935757	0.146039	0.104318	76.3249
9.61973	0	0	0	0.055782	0.79239	0.283128	1.37023	0.210513	16.323	0.651204	11.1128	0.193104	0.734655	0.0842735	1.4219	0.941056	0.00180337	0.0699771	0.15132	0.105889	81.4807
9.64951	0.00246542	0.00338555	0	0.0517496	1.01484	0.414575	1.57026	0.130067	16.7944	0.711528	13.7945	0.180229	0.782097	0.114418	1.46589	1.07141	0	0.0832568	0.148262	0.120498	82.8703
9.67977	0	0	0.00229758	0.0399772	1.3398	0.838335	1.68414	0.173964	17.6707	0.772868	16.7175	0.172912	0.828022	0.130473	1.62359	1.14506	0.0126356	0.107465	0.132244	0.124019	83.4546
9.70965	0.0056349	0	0.00468401	0.031683	1.53607	2.54494	1.88916	0.192291	18.7618	0.78312	19.112	0.18655	0.898982	0.121432	1.74783	1.42611	0.0300443	0.0921306	0.137748	0.132702	87.7365
9.73953	0.0113834	0	0.00956184	0.0474957	2.13042	9.91461	1.9746	0.197995	19.107	0.846827	22.7225	0.188461	0.911336	0.172536	1.92421	1.95225	0.0363245	0.105586	0.163634	0.13083	88.4792
9.76954	0.00375205	0.00461791	0.031712	0.0552372	2.15829	13.6238	2.07271	0.264808	19.3143	0.94518	26.4993	0.170105	0.893115	0.225989	1.99976	3.06134	0.0183325	0.102929	0.157689	0.138826	89.1691
9.79964	0	0	0.0445694	0.0421943	2.26204	16.1758	2.20256	0.289716	19.4118	0.951487	31.0108	0.231772	1.00928	0.271812	2.08568	5.7224	0.0141367	0.129843	0.137108	0.115671	89.5096
9.82978	0	0.00298344	0.048863	0.0516574	2.31282	18.895	2.40149	0.323085	20.0507	1.08568	35.4251	0.166345	1.03713	0.286993	2.23663	13.1698	0.0620471	0.10453	0.19439	0.156303	91.9112
9.86004	0.0046679	0	0.0931057	0.0497398	2.91423	21.4567	2.60442	0.515839	19.5371	1.06632	38.1241	0.196562	1.03147	0.28941	2.32972	22.9936	0.051417	0.133728	0.129585	0.159292	92.2472
9.89008	0	0.00635335	0.135867	0.0516502	3.85904	25.9277	2.68989	0.41954	19.0524	1.1009	41.0076	0.22098	1.03383	0.401064	2.29446	34.3135	0.116407	0.125862	0.194609	0.165333	92.758
9.92002	0.00320235	0	0.133864	0.0514635	3.89355	33.0685	2.88278	0.404365	19.277	1.16712	45.2376	0.21008	1.02888	0.442581	2.49983	44.3415	0.066208	0.102128	0.146567	0.148789	93.5621
9.9495	0	0.000579691	0.245624	0.0580734	3.90712	37.9377	3.16562	0.419913	19.1661	1.25478	48.7644	0.214123	1.09785	0.427232	2.56218	52.0604	0.232576	0.15043	0.182622	0.161734	94.4649
9.97959	0.0100616	0	0.259488	0.0483089	4.40901	40.6742	3.33627	0.410731	18.2201	1.2487	51.9623	0.187686	1.12977	0.431788	2.66925	58.6944	0.290375	0.117434	0.178886	0.130801	94.6656
10.0097	0.00144381	0.00144381	0.363624	0.0693553	4.76805	43.8429	3.28321	0.348861	18.1872	1.28127	54.9821	0.225271	1.22485	0.477902	2.66798	65.2371	0.318358	0.11648	0.224881	0.148424	94.7504
10.0397	0.0262657	0.00410488	0.395886	0.0702357	5.04788	47.0739	3.3958	0.418804	18.6045	1.31327	58.7054	0.186843	1.22785	0.535617	2.86551	73.0466	0.569738	0.141512	0.166489	0.144096	96.6027
10.0698	0.000189657	0.00404822	0.418813	0.0486103	5.31524	50.2321	3.56482	0.444416	18.2671	1.39394	61.5109	0.189059	1.16693	0.561069	2.83588	77.9512	0.722706	0.130679	0.21013	0.151986	96.5907
10.0996	0.0266051	0.00700137	0.474028	0.0804598	5.25831	54.3759	3.68866	0.542956	18.1903	2.29452	64.8907	0.216412	1.25193	0.543866	2.89074	83.1034	0.833376	0.137997	0.19551	0.174194	96.4693
10.1296	0.0144753	0.00542863	0.509152	0.0536415	5.21955	56.4191	3.86057	0.605849	18.5783	2.83945	68.7097	0.206392	1.2206	0.608563	2.89015	86.7075	1.20457	0.175386	0.242302	0.176222	97.1862
10.1594	0.0353343	0	0.625632	0.046361	5.79161	61.0492	4.15142	0.60567	18.8583	3.35066	72.6341	0.232321	1.33643	0.590123	3.04326	89.708	1.42079	0.157304	0.180566	0.157478	98.113
10.1896	0.0383362	0	0.58651	0.0563109	5.81424	61.2558	4.32955	0.472357	19.1813	3.39494	75.8308	0.238951	1.31917	0.622416	3.12439	92.0938	1.52693	0.184219	0.221334	0.163477	99.5444
10.2199	0.0671196	0	0.643256	0.0713892	5.42853	62.8573	6.34535	0.545729	19.4643	3.37273	80.7727	0.197115	1.23753	0.718982	3.11318	94.8682	1.60828	0.132872	0.228862	0.173763	99.5131
10.2495	0.0947135	0.00360619	0.682318	0.0591964	5.66213	66.4215	9.57099	0.567635	20.0848	3.973	85.4347	0.210962	1.28238	0.76043	3.39431	98.3014	1.75698	0.125638	0.212471	0.167926	101.242
10.2798	0.180454	0	0.774435	0.0766818	5.62486	67.4703	9.64671	0.472794	20.5882	4.34578	90.0512	0.260682	1.30096	0.779264	3.29505	100.172	1.81446	0.165419	0.204306	0.181274	102.009
10.3095	0.308099	0.00279848	0.736499	0.0629164	5.95382	68.5232	10.0495	0.512221	21.2089	4.68834	94.6547	0.236305	1.35414	0.809159	3.39886	100.925	1.75624	0.158614	0.197607	0.162578	102.183
10.3399	0.588233	0	0.886587	0.0689651	5.6987	69.2365	10.4847	0.598261	21.3014	4.66601	100.576	0.234026	1.3313	0.868542	3.27771	102.897	1.91996	0.136213	0.245723	0.199519	103.176
10.3698	1.31214	0.00459343	1.79423	0.0755444	5.79375	71.1284	11.5768	0.582053	22.4825	4.80067	107.042	0.215071	1.56616	0.898999	3.37098	104.067	1.78902	0.148499	0.234129	0.190824	104.582
10.3996	3.26163	0.00813	2.05504	0.0323359	5.48626	71.4534	12.4048	0.524873	23.1055	4.9746	112.227	0.270469	1.38551	0.868154	3.4629	104.498	1.82778	0.13473	0.245609	0.190697	104.797
10.43	3.6582	0.00873086	2.12522	0.0719731	5.54179	72.0465	12.7018	0.617741	23.5082	4.93674	119.449	0.24517	1.42318	0.847407	3.41342	106.261	1.94555	0.14759	0.237522	0.209284	105.574
10.4598	4.96535	0.00651107	2.33521	0.0451416	5.53186	73.3942	13.3215	0.587911	24.1118	5.50156	128.634	0.247261	1.43003	1.03615	3.64693	107.829	1.91223	0.197119	0.227022	0.20095	107.629
10.4899	19.088	0	2.5003	0.0529204	5.59515	74.4963	13.7721	0.667611	24.5299	5.81829	136.589	0.224129	1.4677	1.01454	3.74872	108.869	1.92003	0.221535	0.208708	0.163187	107.994
10.5194	95.1826	0.0146685	2.63271	0.0497368	5.4053	74.8105	14.5739	0.723241	25.0723	5.9722	145.278	0.227268	1.5121	1.08572	3.69194	109.081	1.98605	0.173829	0.260712	0.207867	107.684
10.5495	116.045	0.00958224	2.86371	0.0162377	5.10577	75.0345	14.9776	0.613295	25.3106	6.11127	155.923	0.254869	1.4894	0.998808	3.60865	109.796	1.80991	0.202198	0.272072	0.170101	108.833
10.58	167.355	0.0169565	2.90524	0.0560222	5.3273	77.2099	15.9781	0.676111	26.0434	6.36599	170.499	0.302514	1.58752	1.14592	3.87581	112.747	2.00097	0.19371	0.284472	0.179149	111.248
10.6099	169.039	0.0278301	3.31104	0.0417736	5.21952	76.9661	16.7931	0.704506	25.954	6.77962	178.904	0.24872	1.54972	1.096	3.74409	113.156	2.01936	0.192107	0.251292	0.197575	110.744
10.6397	178.973	0.00304534	3.56849	0.0937626	4.96561	78.5559	17.6694	0.707433	26.7292	6.64694	192.779	0.264579	1.48686	1.08731	3.89479	114.198	2.027	0.175594	0.229303	0.181259	112.443
10.67	225.777	0.0623686	3.72873	0.0479687	4.95151	80.5103	18.4826	0.750015	27.2978	7.11561	208.341	0.255062	1.56258	1.13922	3.912	116.698	2.13326	0.20405	0.240575	0.196119	113.124
10.6997	257.655	0.0990194	3.66302	0.0882129	4.91768	81.2863	19.6966	0.689364	28.1	7.41647	222.252	0.290952	1.57536	1.1377	3.96332	118.891	2.12154	0.204624	0.315129	0.197799	115.769
10.73	286.179	0.154927	3.87297	0.0917109	4.68544	81.618	20.5643	0.679061	28.2056	7.4251	234.665	0.289407	1.7098	1.14875	4.04409	118.776	2.00607	0.183391	0.271176	0.204517	115.051
10.7596	300.94	0.127153	3.96585	0.0956792	4.7476	82.1614	21.198	0.716339	27.8686	7.78865	246.147	0.301033	1.6486	1.18025	3.98287	119.233	2.18385	0.175115	0.291984	0.180202	115.478
10.7894	312.185	0.305699	4.05662	0.0988586	4.74066	85.4018	22.5246	0.745844	29.3672	8.03598	265.829	0.292537	1.65	1.17498	4.12137	122.056	2.19283	0.211327	0.243307	0.238858	118.714
10.82	325.414	0.845912	4.05606	0.111066	4.59995	84.9895	23.4957	0.74757	29.4761	8.09183	277.391	0.334245	1.52244	1.17105	4.09135	122.407	2.19385	0.217019	0.253499	0.228129	117.846
10.8495	341.673	4.17598	4.1889	0.151563	4.40517	86.001	23.7563	0.823881	29.535	8.35928	288.642	0.331451	1.59638	1.17029	3.89729	122.86	2.24083	0.25489	0.267927	0.312435	118.746
10.8799	361.704	33.4902	4.40724	0.0859991	4.40151	88.035	25.2519	0.77732	31.0334	8.59736	307.773	0.34842	1.55123	1.17298	4.18088	125.032	2.33392	0.241209	0.27181	0.303657	122.389
10.9093	373.408	46.0713	4.43498	0.163621	4.41596	88.6683	26.0511	0.76311	31.2276	8.90198	320.437	0.369807	1.55725	1.25513	4.21037	126.921	2.38283	0.258165	0.282532	0.29624	123.676
10.94	377.727	46.6833	4.47348	0.112802	4.27629	89.413	26.9082	0.773636	31.4656	8.90449	333.125	0.368373	1.56373	1.16352	4.1756	128.032	2.43676	0.298077	0.268458	0.28072	123.804
10.9699	379.155	47.3563	4.42433	0.158762	4.05162	89.8213	27.7373	0.777979	32.2342	9.03207	343.981	0.388035	1.57269	1.15357	4.27131	128.927	2.40536	0.208599	0.240338	0.314548	124.486
10.9999	393.785	49.8649	4.38718	0.147218	3.9779	91.9936	29.5038	0.815648	32.9842	9.38429	362.025	0.382502	1.60995	1.25263	4.38077	132.95	2.58123	0.263957	0.289482	0.317429	127.966

## Sheet: Temperature profiles
	Tmax/K
Distance/mm	689	742	796	850	905	956	1006	1056	1107	1156	1206	1257	1319
0	321.15	325.65	330.15	334.65	339.15	344.15	349.15	354.15	359.15	364.15	369.15	374.15	379.15
5	329.15	333.9	338.65	343.4	348.15	356.65	365.15	373.65	382.15	390.65	399.15	407.65	416.15
10	339.15	345.9	352.65	359.4	366.15	378.4	390.65	402.9	415.15	427.4	439.65	451.9	464.15
20	353.15	364.15	375.15	386.15	397.15	414.4	431.65	448.9	466.15	483.4	500.65	517.9	535.15
30	368.15	384.4	400.65	416.9	433.15	457.65	482.15	506.65	531.15	555.65	580.15	604.65	629.15
40	389.15	412.65	436.15	459.65	483.15	515.4	547.65	579.9	612.15	644.4	676.65	708.9	741.15
50	417.15	446.65	476.15	505.65	535.15	578.4	621.65	664.9	708.15	751.4	794.65	837.9	881.15
60	449.15	485.4	521.65	557.9	594.15	648.15	702.15	756.15	810.15	864.15	918.15	972.15	1026.15
70	485.15	528.65	572.15	615.65	659.15	720.15	781.15	842.15	903.15	964.15	1025.15	1086.15	1147.15
80	522.15	572.15	622.15	672.15	722.15	787.9	853.65	919.4	985.15	1050.9	1116.65	1182.4	1248.15
90	578.15	636.4	694.65	752.9	811.15	874.65	938.15	1001.65	1065.15	1128.65	1192.15	1255.65	1319.15
100	616.15	673.4	730.65	788.9	847.15	905.4	963.65	1021.9	1080.01	1137.97	1195.84	1253.75	1311.65
110	636.15	691.65	747.15	803.65	860.15	914.65	969.15	1023.65	1078.01	1132.22	1186.34	1240.5	1294.65
130	649.15	703.4	757.65	813.9	870.15	923.15	976.15	1029.15	1081.88	1134.28	1186.53	1238.86	1291.16
150	658.15	711.65	765.15	821.15	877.15	929.65	982.15	1034.65	1086.81	1138.57	1190.12	1241.78	1293.41
170	665.463	717.229	769.15	824.15	879.15	930.9	982.65	1034.4	1085.74	1136.6	1187.22	1237.96	1288.66
190	672.776	724.558	776.555	831.153	885.747	936.335	986.94	1037.51	1087.74	1137.6	1187.22	1236.96	1286.66
210	679.089	732.137	785.365	839.659	893.941	944.705	995.52	1046.24	1096.81	1147.32	1197.62	1248.03	1298.41
230	685.715	738.795	792.27	847.412	902.538	953.39	1004.31	1055.1	1105.67	1156.13	1206.32	1256.63	1306.91
250	689.341	741.703	794.675	849.915	905.135	955.575	1006.1	1056.47	1106.53	1156.45	1206.01	1255.74	1305.41
270	688.654	742.032	795.89	849.924	903.926	953.88	1003.97	1053.8	1103.6	1153.66	1203.41	1253.31	1303.16
290	687.654	741.532	795.7	849.43	903.12	952	1001.05	1049.78	1098.53	1147.7	1196.51	1245.49	1294.41
310	685.967	739.611	793.605	848.683	903.717	951.935	1000.34	1048.39	1096.26	1144.33	1191.88	1239.69	1287.42
320	683.593	736.019	789.105	845.933	902.717	950.185	997.84	1045.14	1091.92	1138.49	1184.36	1230.58	1276.67
330	678.532	730.756	783.82	840.192	896.508	942.74	989.21	1035.23	1080.78	1126.31	1171.05	1216.18	1261.18
340	673.158	725.414	778.44	835.204	891.896	935.98	980.37	1024.18	1067.44	1110.72	1153.03	1195.81	1238.43
350	664.097	715.651	768.06	825.216	882.284	923.72	965.53	1006.64	1047.03	1087.42	1126.6	1166.37	1205.94
360	652.036	703.388	755.395	811.987	868.463	905.515	943.06	979.677	1015.55	1051.65	1086.26	1121.6	1156.7
370	637.914	684.862	732.92	789.252	845.448	876.94	909.01	939.992	969.73	999.3	1026.9	1055.47	1083.72
380	614.792	661.086	708.375	765.785	823.015	845.475	868.7	890.485	910.704	930.795	948.325	967.116	985.485
390	603.231	649.198	696.102	754.052	811.798	829.743	848.545	865.731	881.191	896.542	909.037	922.939	936.369
400	591.67	637.31	683.83	742.318	800.582	814.01	828.39	840.978	851.678	862.29	869.75	878.762	887.254
